# Supplementary material for: Ecological Risk Evaluation and Removal of Emerging Pollutants in Urban Wastewater by a Hollow Fiber Forward Osmosis Membrane
Source: MDPI journal article supplement (doi:10.3390/membranes12030293), 2022-03-04
Supplement: s1 [file s1]

# Ecological Risk Evaluation and Removal of Emerging Pollutants in Urban Wastewater by a Hollow Fiber forward Osmosis Membrane

Mónica Salamanca <sup>1,2</sup>, Rebeca López-Serna <sup>1,3</sup>, Laura Palacio <sup>1,4,\*</sup>, Antonio Hernandez <sup>1,4</sup>, Pedro Prádanos <sup>1,4</sup> and Mar Peña <sup>1,2</sup>

<sup>1</sup> Institute of Sustainable Processes (ISP), University of Valladolid, Dr. Mergelina s/n, E-47011 Valladolid, Spain; monica.salamanca@uva.es (M.S.); rebeca.lopez@uva.es (R.L.-S.); antonio.hernandez@uva.es (A.H.); ppradanos@uva.es (P.P.); pena@iq.uva.es (M.P.)

<sup>2</sup> Department of Chemical Engineering and Environmental Technology, University of Valladolid, Dr. Mergelina s/n, E-47011 Valladolid, Spain

<sup>3</sup> Department of Analytical Chemistry, Faculty of Sciences, University of Valladolid Paseo Belén 7, E-47011 Valladolid, Spain

<sup>4</sup> Department of Applied Physics, Faculty of Sciences, University of Valladolid, Paseo Belén 7, E-47011, Valladolid, Spain

\* Correspondence: laura.palacio@uva.es

**Table S1.** Specifications for the Aquaporin Inside TM FO hollow fiber module as provided by the membrane manufacturer.

|                                                                                                                              |                                                       |
|------------------------------------------------------------------------------------------------------------------------------|-------------------------------------------------------|
| Manufacturer                                                                                                                 | Aquaporin A/S (Copenhagen, Denmark)                   |
| Membrane module                                                                                                              | HFFO.6                                                |
| Active area                                                                                                                  | 0.6 m <sup>2</sup>                                    |
| Number of fibers                                                                                                             | 8000                                                  |
| Fiber length                                                                                                                 | 120 mm                                                |
| Inner diameter of fibers                                                                                                     | 200 µm                                                |
| Wall thickness of fiber                                                                                                      | 35 µm                                                 |
| Active layer                                                                                                                 | Polyamide thin film composite (TFC) with AQP vesicles |
| Porous support layer                                                                                                         | Polysulfone (PS)                                      |
| Cross sectional area shell                                                                                                   | 3.28E-05 m <sup>2</sup>                               |
| Cross sectional area lumen                                                                                                   | 2.51E-04 m <sup>2</sup>                               |
| Water flux (DI water vs.0.5M NaCl, 25 L/h as feed flow rate and 15 L/h as draw flow rate, temperature 298 K)                 | 11 ± 1.5 L/m <sup>2</sup> h                           |
| Specific reverse salt flux (DI water vs.0.5M NaCl, 25 L/h as feed flow rate and 15 L/h as draw flow rate, temperature 298 K) | 0.15 ± 0.05 g/L                                       |

**Table S2.** Operational conditions of the UHPLC-MS/MS equipment.

| Analytes         | Q1  | Q3  | Declustering<br>potential (V) | Collision<br>energy (V) | Cell extraction<br>potential (V) | Retention<br>time (min) |
|------------------|-----|-----|-------------------------------|-------------------------|----------------------------------|-------------------------|
| Penicilina G     | 335 | 160 | 111                           | 23                      | 18                               | 4.98                    |
|                  |     | 176 |                               | 19                      | 16                               |                         |
| Oxytetracycline  | 461 | 426 | 151                           | 27                      | 30                               | 3.64                    |
|                  |     | 443 |                               | 19                      | 32                               |                         |
| Doxycycline      | 445 | 428 | 111                           | 27                      | 34                               | 4.52                    |
|                  |     | 410 |                               | 37                      | 36                               |                         |
| Tetracycline     | 445 | 410 | 51                            | 27                      | 32                               | 3.30                    |
|                  |     | 427 |                               | 19                      | 32                               |                         |
| Marbofloxacin    | 363 | 320 | 66                            | 23                      | 24                               | 2.77                    |
|                  |     | 327 |                               | 25                      | 24                               |                         |
| Enrofloxacin     | 360 | 316 | 91                            | 29                      | 38                               | 4.18                    |
|                  |     | 342 |                               | 33                      | 38                               |                         |
| Danofloxacin     | 358 | 340 | 86                            | 33                      | 24                               | 4.16                    |
|                  |     | 314 |                               | 27                      | 38                               |                         |
| Sulfadiazine     | 251 | 156 | 71                            | 23                      | 20                               | 1.50                    |
|                  |     | 108 |                               | 31                      | 12                               |                         |
| Sulfathiazole    | 256 | 156 | 96                            | 21                      | 8                                | 1.84                    |
|                  |     | 108 |                               | 33                      | 12                               |                         |
| Sulfamethizole   | 271 | 156 | 31                            | 21                      | 10                               | 3.61                    |
|                  |     | 108 |                               | 35                      | 12                               |                         |
| Sulfadimidine    | 279 | 186 | 86                            | 25                      | 22                               | 3.76                    |
|                  |     | 124 |                               | 33                      | 6                                |                         |
| Sulfamethoxazole | 254 | 156 | 66                            | 23                      | 24                               | 4.18                    |
|                  |     | 108 |                               | 33                      | 16                               |                         |
| Tylosin          | 916 | 772 | 156                           | 43                      | 36                               | 4.79                    |
|                  |     | 174 |                               | 51                      | 10                               |                         |
| Tiamulin         | 494 | 192 | 51                            | 29                      | 10                               | 4.72                    |
|                  |     | 119 |                               | 59                      | 12                               |                         |
| Apramycin        | 271 | 156 | 50                            | 20                      | 19                               | 3.57                    |
|                  |     | -   |                               | -                       | -                                |                         |
| Trimethoprim     | 291 | 230 | 51                            | 33                      | 18                               | 2.18                    |
|                  |     | 261 |                               | 35                      | 16                               |                         |
| Florfenicol      | 358 | 340 | 66                            | 13                      | 24                               | 4.18                    |
|                  |     | 241 |                               | 25                      | 14                               |                         |
| Fenbendazol      | 300 | 268 | 96                            | 29                      | 22                               | 5.14                    |
|                  |     | 159 |                               | 49                      | 10                               |                         |
| Dexamethasone    | 393 | 355 | 41                            | 19                      | 20                               | 5.06                    |
|                  |     | 147 |                               | 39                      | 10                               |                         |
| Progesterone     | 315 | 109 | 141                           | 31                      | 10                               | 5.39                    |
|                  |     | 297 |                               | 23                      | 28                               |                         |
| Methylparaben    | 153 | 121 | 66                            | 21                      | 14                               | 4.48                    |
|                  |     | 109 |                               | 15                      | 30                               |                         |
| Carbamazepine    | 237 | 194 | 66                            | 29                      | 12                               | 4.94                    |
|                  |     | 193 |                               | 47                      | 6                                |                         |

Table S2. *Cont.*

|                                    |      |     |     |     |     |      |
|------------------------------------|------|-----|-----|-----|-----|------|
|                                    | 260  | 183 | 66  | 25  | 12  | 4.47 |
| Propanolol                         |      | 116 |     | 25  | 8   |      |
| Sulfapyridine                      | 250  | 156 | 61  | 23  | 10  | 1.93 |
|                                    |      | 108 |     | 35  | 12  |      |
| Metronidazole                      | 172  | 128 | 41  | 21  | 6   | 0.91 |
|                                    |      | 82  |     | 35  | 14  |      |
| Ofloxacin                          | 362  | 318 | 86  | 29  | 26  | 5.91 |
|                                    |      | 261 |     | 37  | 14  |      |
| Naproxen                           | 231  | 185 | 56  | 21  | 12  | 5.15 |
|                                    |      | 170 |     | 37  | 10  |      |
| Clarithromycin                     | 748  | 590 | 96  | 25  | 40  | 6.19 |
|                                    |      | 158 |     | 41  | 26  |      |
| Erythromycin                       | 734  | 576 | 46  | 25  | 36  | 5.06 |
|                                    |      | 158 |     | 37  | 22  |      |
| Clofibrate                         | 243  | 169 | 86  | 17  | 22  | 5.38 |
|                                    |      | 197 |     | 13  | 10  |      |
| Levofloxacin                       | 362  | 318 | 6   | 27  | 20  | 3.90 |
|                                    |      | 261 |     | 37  | 24  |      |
| Norfloxacin                        | 320  | 276 | 96  | 27  | 18  | 3.93 |
|                                    |      | 233 |     | 37  | 16  |      |
| 1,4-Benzoquinone                   | 109  | 81  | 121 | 19  | 4   | 5.09 |
|                                    |      | 53  |     | 29  | 12  |      |
| Atorvastatin                       | 559  | 440 | 26  | 33  | 38  | 5.32 |
|                                    |      | 250 |     | 59  | 18  |      |
| Atenolol                           | 267  | 145 | 11  | 33  | 24  | 0.80 |
|                                    |      | 190 |     | 29  | 4   |      |
| Caffeine                           | 195  | 138 | 71  | 27  | 18  | 3.81 |
|                                    |      | 110 |     | 31  | 16  |      |
| Atrazine                           | 216  | 174 | 71  | 25  | 22  | 5.02 |
|                                    |      | 104 |     | 41  | 16  |      |
| DEET                               | 192  | 119 | 56  | 23  | 10  | 5.25 |
|                                    |      | 91  |     | 41  | 10  |      |
| Ciprofloxacin                      | 332  | 314 | 31  | 29  | 38  | 4.07 |
|                                    |      | 231 |     | 57  | 16  |      |
| 17- $\alpha$ -<br>Ethinylestradiol | 297  | 107 | 71  | 33  | 12  | 5.56 |
|                                    |      | 77  |     | 79  | 10  |      |
| Crotamiton                         | 204  | 69  | 61  | 35  | 12  | 5.63 |
|                                    |      | 136 |     | 27  | 14  |      |
| Estrone (E1)                       | 271  | 253 | 101 | 19  | 10  | 5.54 |
|                                    |      | 133 |     | 35  | 12  |      |
| Ethylparaben                       | 165  | 137 | -35 | -20 | -11 | 4.84 |
|                                    |      | 136 |     | -20 | -13 |      |
| Propylparaben                      | 179  | 137 | -60 | -20 | -13 | 5.03 |
|                                    |      | 136 |     | -24 | -17 |      |
| Diclofenac Sodium<br>Salt          | 294  | 250 | -10 | -18 | -7  | 5.47 |
|                                    |      | 214 |     | -28 | -9  |      |
| Ibuprofen                          | 2054 | 159 | -35 | -10 | -15 | 5.38 |
|                                    |      | 161 |     | -12 | -21 |      |

**Table S2.** *Cont.*

|                       |     |                   |     |                   |                   |      |
|-----------------------|-----|-------------------|-----|-------------------|-------------------|------|
| Salicylic acid        | 137 | $\frac{93}{-}$    | -40 | $\frac{-22}{-}$   | $\frac{-15}{-}$   | 4.42 |
| Clofibric acid        | 213 | $\frac{127}{85}$  | -35 | $\frac{-24}{-14}$ | $\frac{-15}{-9}$  | 5.14 |
| Triclosan             | 287 | $\frac{287}{142}$ | -90 | $\frac{-6}{-48}$  | $\frac{-17}{-15}$ | 5.50 |
| 4-Hydroxybenzoic acid | 137 | $\frac{93}{65}$   | -5  | $\frac{-16}{-40}$ | $\frac{-15}{-13}$ | 4.43 |
| Gemfibrozil           | 249 | $\frac{121}{127}$ | -5  | $\frac{-30}{-14}$ | $\frac{-7}{-5}$   | 6.65 |

**Table S3.** Method Limits of Detection (MLD) and Method Limits of Quantitation (MLQ).

| <b>Analytes</b>  | <b>MLD<br/>(ng/L)</b> | <b>MLQ<br/>(ng/L)</b> | <b>Analytes</b>                | <b>MLD<br/>(ng/L)</b> | <b>MLQ<br/>(ng/L)</b> |
|------------------|-----------------------|-----------------------|--------------------------------|-----------------------|-----------------------|
| Penicillin G     | 218.14                | 727.13                | Naproxen                       | 8.88                  | 29.60                 |
| Oxytetracycline  | 83.16                 | 277.24                | Clarithromycin                 | 6.91                  | 23.04                 |
| Doxycycline      | 30.63                 | 214.30                | Erythromycin                   | 134.83                | 449.43                |
| Tetracycline     | 7.62                  | 25.41                 | Clofibrate                     | 111.50                | 371.68                |
| Marbofloxacin    | 160.94                | 536.46                | Levofloxacin                   | 7.16                  | 23.86                 |
| Enrofloxacin     | 35.72                 | 119.07                | Norfloxacin                    | 188.59                | 628.62                |
| Danofloxacin     | 159.26                | 530.86                | 1,4-Benzoquinone               | 1371.98               | 4573.26               |
| Sulfadiazine     | 93.97                 | 313.24                | Atorvastatin                   | 0.84                  | 2.81                  |
| Sulfathiazole    | 110.06                | 366.87                | Atenolol                       | 13.57                 | 45.22                 |
| Sulfamethizole   | 31.04                 | 103.48                | Caffeine                       | 4.41                  | 14.71                 |
| Sulfadimidine    | 27.39                 | 91.23                 | Atrazine                       | 2.52                  | 8.41                  |
| Sulfamethoxazole | 2.45                  | 8.17                  | DEET                           | 0.82                  | 2.72                  |
| Tylosin          | 104.45                | 348.17                | Ciprofloxacin                  | 5.05                  | 16.85                 |
| Tiamulin         | 23.60                 | 78.62                 | 17- $\alpha$ -Ethinylestradiol | 706.46                | 2354.87               |
| Apramycin        | 125.33                | 417.76                | Crotamiton                     | 3.15                  | 10.51                 |
| Trimethoprim     | 0.81                  | 2.69                  | Estrone                        | 300.91                | 1003.05               |
| Florfenicol      | 502.39                | 1674.65               | Ethyl Paraben                  | 77.11                 | 257.02                |
| Fenbendazol      | 0.68                  | 2.25                  | Propyl Paraben                 | 138.19                | 460.64                |
| Dexametasone     | 110.10                | 367.00                | Diclofenac Sodium Salt         | 24.47                 | 81.57                 |
| Progesterone     | 24.49                 | 81.64                 | Ibuprofen                      | 266.37                | 887.89                |
| Methyl paraben   | 7.64                  | 25.46                 | Salicylic acid                 | 72.52                 | 241.74                |
| Carbamazepine    | 2.31                  | 7.72                  | Clofibric acid                 | 14.28                 | 47.61                 |
| Propanolol       | 5.75                  | 19.15                 | Triclosan                      | 986.85                | 3289.51               |
| Sulfapyridine    | 0.27                  | 0.90                  | 4-Hydroxybenzoic acid          | 112.73                | 375.76                |
| Metronidazole    | 80.94                 | 269.80                | Gemfibrozil                    | 5.27                  | 17.56                 |
| Ofloxacin        | 6.23                  | 20.75                 |                                |                       |                       |

**Table S4.** Diffusion coefficient and Van't Hoff values [1-4].

| Salt              | i theorist Van't Hoff | i experimental Van't Hoff | Diffusion coefficient (m <sup>2</sup> /s) |
|-------------------|-----------------------|---------------------------|-------------------------------------------|
| NaCl              | 2                     | 1.87                      | 1.610                                     |
| MgCl <sub>2</sub> | 3                     | 2.84                      | 1.249                                     |
| MgSO <sub>4</sub> | 2                     | 1.04                      | 0.849                                     |
| AcNa              | 2                     | 1.92                      | 1.200                                     |
| Glucose           | 1                     | 1.00                      | 0.673                                     |

**Table S5.** Ionic radius of the ions studied [5].

| Ion                           | Ionic radius (pm) |
|-------------------------------|-------------------|
| Ac <sup>-</sup>               | 162               |
| Cl <sup>-</sup>               | 184               |
| SO <sub>4</sub> <sup>2-</sup> | 258               |
| Na <sup>+</sup>               | 102               |
| Mg <sup>2+</sup>              | 72                |

**Table S6.** Chemical Oxygen Demand (COD) recovery in aquaporin forward osmosis membrane.

| Samples       | COD recovery % |
|---------------|----------------|
| FS experiment | 81.32          |
| FS 1wash      | 27.75          |
| FS 2wash      | 3.36           |
| FS 3wash      | 10.08          |
| total         | 122.51         |

**Table S7.** Inorganic Carbon (IC) and Total Carbon (TC) recovery in aquaporin forward osmosis membrane.

| Samples       | IC recovery % | TC recovery % |
|---------------|---------------|---------------|
| FS experiment | 69.39         | 72.31         |
| FS 1wash      | 9.15          | 10.02         |
| FS 2wash      | 3.78          | 4.45          |
| FS 3wash      | 1.82          | 2.07          |
| total         | 84.15         | 88.84         |

**Table S8.** Properties of compounds present in effluent of urban WWTP in the city of Valladolid.

| Analytes         | MW (amu) | log K <sub>ow</sub> at 25 °C | log D  | Charge pH 7 |
|------------------|----------|------------------------------|--------|-------------|
| Sulfamethoxazole | 253.28   | 0.659                        | -0.558 | Negative    |
| Diclofenac       | 296.15   | 4.548                        | 1.727  | Negative    |
| Naproxen         | 230.26   | 2.876                        | 0.713  | Negative    |
| Ibuprofen        | 206.28   | 3.502                        | 0.911  | Negative    |
| Gemfibrozil      | 250.33   | 4.302                        | 2.050  | Negative    |
| Atorvastatin     | 558.64   | 3.846                        | 1.135  | Negative    |
| Ciprofloxacin    | 331.34   | 1.625                        | 1.625  | Neutral     |
| Ofloxacin        | 361.37   | 1.855                        | 1.855  | Neutral     |
| Carbamazepine    | 236.27   | 1.895                        | 1.895  | Neutral     |
| Caffeine         | 194.19   | -0.628                       | -0.628 | Neutral     |
| DEET             | 191.27   | 2.419                        | 2.419  | Neutral     |
| Fenbendazole     | 299.35   | 2.033                        | 2.033  | Neutral     |
| Methylparaben    | 152.15   | 1.882                        | 1.882  | Neutral     |
| Sulfapyridine    | 249.29   | 0.469                        | 0.469  | Neutral     |
| Levofloxacin     | 361.37   | 1.855                        | 1.855  | Neutral     |
| Clarithromycin   | 747.95   | 2.805                        | 1.616  | Positive    |
| Atenolol         | 266.34   | 0.335                        | -2.097 | Positive    |
| Trimethoprim     | 290.32   | 0.594                        | 0.273  | Positive    |

**Table S9.** Some properties of the compounds taken from the SciFinder database and additional information.

| Analytes         | Therapeutic subclass | Therapeutic class | MW (amu) | Molecular formula                                               | Structure                                                                             | pKa at 25 °C                          |
|------------------|----------------------|-------------------|----------|-----------------------------------------------------------------|---------------------------------------------------------------------------------------|---------------------------------------|
| Ciprofloxacin    | Fluroquinolones      | Antibiotics       | 331.34   | C <sub>17</sub> H <sub>18</sub> FN <sub>3</sub> O <sub>3</sub>  | 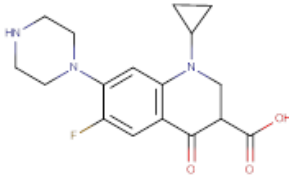   | Most acidic: 6.43<br>Most basic: 8.68 |
| Ofloxacin        |                      |                   | 361.37   | C <sub>18</sub> H <sub>20</sub> N <sub>3</sub> FO <sub>4</sub>  |    | Most Acidic: 5.19<br>Most Basic: 7.37 |
| Levofloxacin     |                      |                   | 361.37   | C <sub>18</sub> H <sub>20</sub> F N <sub>3</sub> O <sub>4</sub> |   | Most acidic: 5.19<br>Most basic: 7.37 |
| Sulfamethoxazole | Sulfonamides         |                   | 253.28   | C <sub>10</sub> H <sub>11</sub> N <sub>3</sub> O <sub>3</sub> S |  | Most acidic: 5.81<br>Most basic: 1.39 |



|                |               |        |                       |                                                                                       |                                        |
|----------------|---------------|--------|-----------------------|---------------------------------------------------------------------------------------|----------------------------------------|
| Clarithromycin | Macrolides    | 747.95 | $C_{38}H_{69}NO_{13}$ | 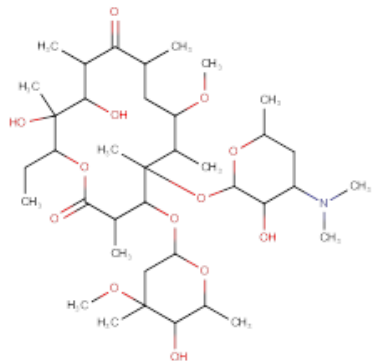   | Most acidic: 13.08<br>Most basic: 8.16 |
| Sulfapyridine  | Antibacterial | 249.29 | $C_{11}H_{11}N_3O_2S$ |    | Most Acidic: 8.54<br>Most Basic: 2.13  |
| Trimethoprim   | Antibacterial | 290.32 | $C_{14}H_{18}N_4O_3$  |  | Most Basic: 7.04                       |

|              |                                          |                                |        |                        |                                                                                      |                                        |
|--------------|------------------------------------------|--------------------------------|--------|------------------------|--------------------------------------------------------------------------------------|----------------------------------------|
| Diclofenac   |                                          |                                | 296.15 | $C_{14}H_{11}Cl_2NO_2$ | 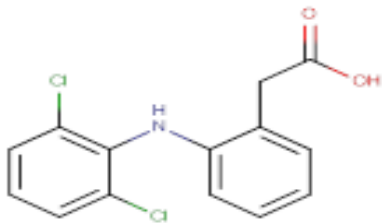  | Most acidic: 4.18<br>Most basic: -2.26 |
| Naproxen     | AINE<br>(antiinflamatorio no esteroideo) | Analgesics/anti-inflammatories | 230.26 | $C_{14}H_{14}O_3$      |   | Most acidic: 4.84                      |
| Ibuprofen    |                                          |                                | 206.28 | $C_{13}H_{18}O_2$      |   | Most acidic: 4.41                      |
| Fenbendazole | Anti-parasitics                          |                                | 299.35 | $C_{15}H_{13}N_3O_2S$  |  | Most Acidic: 12.13                     |

|               |                     |                                       |        |                                                                |                                                                                       |                                         |
|---------------|---------------------|---------------------------------------|--------|----------------------------------------------------------------|---------------------------------------------------------------------------------------|-----------------------------------------|
| Methylparaben | Preservative        |                                       | 152.15 | C <sub>8</sub> H <sub>8</sub> O <sub>3</sub>                   | 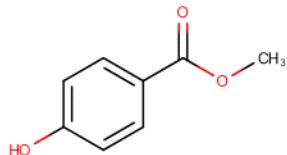   | Most acidic: 8.31                       |
| Atorvastatin  | Lipid-lowering drug | Statins                               | 558.64 | C <sub>33</sub> H <sub>35</sub> FN <sub>2</sub> O <sub>5</sub> |    | Most acidic: 4.29<br>Most basic: 0.38   |
| Gemfibrozil   |                     | Fibric Acid Agents                    | 250.33 | C <sub>15</sub> H <sub>22</sub> O <sub>3</sub>                 |   | Most Acidic: 4.75                       |
| Carbamazepine |                     | Psychiatric drugs/<br>anticonvulsants | 236.27 | C <sub>15</sub> H <sub>12</sub> N <sub>2</sub> O               |  | Most Acidic: 13.94<br>Most Basic: -0.49 |

|          |                  |        |                                                               |                                                                                     |                                        |
|----------|------------------|--------|---------------------------------------------------------------|-------------------------------------------------------------------------------------|----------------------------------------|
| Atenolol | Beta-Blockers    | 266.34 | C <sub>16</sub> H <sub>22</sub> N <sub>2</sub> O <sub>3</sub> | 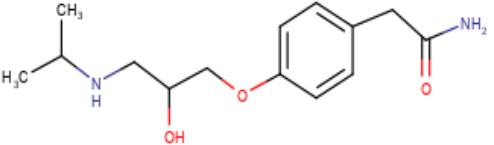 | Most Acidic: 13.88<br>Most Basic: 9.43 |
| Caffeine | Stimulant        | 194.19 | C <sub>8</sub> H <sub>10</sub> N <sub>4</sub> O <sub>2</sub>  |  | Most Basic: 0.52                       |
| DEET     | Insect repellent | 191.27 | C <sub>12</sub> H <sub>17</sub> NO                            |  | Most basic: -1.37                      |

**Table S10.** Further properties of the compounds taken from SciFinder database and additional information.

| <b>Analytes</b>  | <b>Boiling Temp. Tb<br/>(°C) at 101325 Pa</b> | <b>Vapor pressure Vp<br/>(Pa) at 25 °C</b> | <b>Supplier</b> |
|------------------|-----------------------------------------------|--------------------------------------------|-----------------|
| Ciprofloxacin    | 581.80                                        | 2,99E-12                                   | Sigma-Aldrich   |
| Ofloxacin        | 571.50                                        | 6,70E-14                                   | Fisher          |
| Levofloxacin     | 571.50                                        | 8,93E-12                                   | Sigma-Aldrich   |
| Sulfamethoxazole | 482.10                                        | 2,49E-07                                   | Fisher          |
| Clarithromycin   | 805.50                                        | 6,75E-28                                   | Sigma-Aldrich   |
| Sulfapyridine    | 473.50                                        | 3,90E-09                                   | Fisher          |
| Trimethoprim     | 526.00                                        | 3,74E-11                                   | Sigma-Aldrich   |
| Diclofenac       | 412.00                                        | 2,12E-05                                   | Sigma-Aldrich   |
| Naproxen         | 403.90                                        | 4,01E-05                                   | Sigma-Aldrich   |
| Ibuprofen        | 319.60                                        | 1,85E-02                                   | Sigma-Aldrich   |
| Fenbendazole     | 568.20                                        | 2,81E-15                                   | Sigma-Aldrich   |
| Methylparaben    | 265.50                                        | 7,40E-01                                   | Sigma-Aldrich   |
| Atorvastatin     | 722.20                                        | 9,12E-20                                   | Sigma-Aldrich   |
| Gemfibrozil      | 158.50                                        | 6,13E-07                                   | Fisher          |
| Carbamazepine    | 411.00                                        | 7,71E-05                                   | Sigma-Aldrich   |
| Atenolol         | 508.00                                        | 3,82E-11                                   | Fisher          |
| Caffeine         | 416.80                                        | 3,72E-07                                   | Fisher          |
| DEET             | 160.00                                        | 1,35E-03                                   | Fisher          |

**Table S11.** EC50 (mg/L) for daphnia, fish and green algae for the 18 studied contaminants [6-13].

| ANALYTES         | EC50 (mg/L) |         |             |
|------------------|-------------|---------|-------------|
|                  | Daphnia     | Fish    | Green algae |
| Sulfamethoxazole | 25.2        | 562.5   | 0.0         |
| Diclofenac       | 22.0        | 38.4    | 14.5        |
| Naproxen         | 126.1       | 190.0   | 96.6        |
| Ibuprofen        | 9.0         | 42.0    | 4.0         |
| Gemfibrozil      | 10.4        | 7.1     | 9.5         |
| Atorvastatin     | 0.1         | 0.1     | 0.2         |
| Ciprofloxacin    | 620.7       | 197.1   | 0.0         |
| Ofloxacin        | 31.8        | 316.8   | 179.7       |
| Carbamazepine    | 11.9        | 35.4    | 85.0        |
| Caffeine         | 0.4         | 70.0    | 150.0       |
| DEET             | 75.0        | 71.3    | 388.0       |
| Fenbendazole     | 0.0         | 0.3     | 1.0         |
| Methylparaben    | 24.6        | 160.0   | 31.4        |
| Sulfapyridine    | 1.8         | 377.5   | 6.4         |
| Levofloxacin     | 1790.0      | 19400.0 | 2440.0      |
| Clarithromycin   | 25.7        | 280.0   | 2.1         |
| Atenolol         | 51.4        | 774.3   | 2.1         |
| Trimethoprim     | 123.0       | 635.0   | 16.0        |

**Table S12.** Evaluation of ecological risks of pollutants in the water recovered after passing through the membrane.

| ANALYTES         | RQ Daphnia | RQ Fish | RQ Green algae |
|------------------|------------|---------|----------------|
| Sulfamethoxazole | 0.00       | 0.00    | 0.00           |
| Diclofenac       | 0.00       | 0.00    | 0.00           |
| Naproxen         | 0.00       | 0.00    | 0.00           |
| Ibuprofen        | 0.00       | 0.02    | 0.00           |
| Gemfibrozil      | 0.00       | 0.00    | 0.00           |
| Atorvastatin     | 0.00       | 0.02    | 0.01           |
| Ciprofloxacin    | 0.00       | 0.00    | 0.00           |
| Ofloxacin        | 0.00       | 0.00    | 0.00           |
| Carbamazepine    | 0.00       | 0.00    | 0.00           |
| Caffeine         | 0.27       | 0.02    | 0.01           |
| DEET             | 0.00       | 0.00    | 0.00           |
| Fenbendazole     | 0.00       | 0.00    | 0.00           |
| Methylparaben    | 0.00       | 0.00    | 0.00           |
| Sulfapyridine    | 0.00       | 0.00    | 0.00           |
| Levofloxacin     | 0.00       | 0.00    | 0.00           |
| Clarithromycin   | 0.00       | 0.00    | 0.00           |
| Atenolol         | 0.00       | 0.00    | 0.00           |
| Trimethoprim     | 0.00       | 0.00    | 0.00           |

## References

1. Robinson, R.A. and Stokes R.H. Electrolyte solution, 2<sup>nd</sup> ED, UK, Dover, 2002.
2. Lide, D.R, CRC Handbook of Chemistry and Physics, Special Student Edition, 75th ed., CRC Press, Boca Raton, USA, 1994.
3. Gilbert, L. The Osmotic Pressure of Concentrated Solutions and the Laws of the Perfect Solution. *Journal of the American Chemical Society* **1908**, 30 (5), 668–683. <https://doi.org/10.1021/ja01947a002>
4. Castaldi, M., D'Errico, G., Paduano, L., Vitalgiano, V. Transport Properties of the Binary System Glucose–Water at 25 °C. A Velocity Correlation Study. *J. Chem. Eng. Data* **1998**, 43, 653-657. <https://doi.org/10.1021/je980054c>
5. Wolfram Research, Inc. Wolfram|Alpha Notebook Edition, Champaign, IL, 2020.
6. López-Serna, R.; Postigo, C.; Blanco, J.; Pérez, S.; Ginebreda, A.; de Alda, M.L.; Petrović, M.; Munné, A.; Barceló, D. Assessing the Effects of Tertiary Treated Wastewater Reuse on the Presence Emerging Contaminants in a Mediterranean River (Llobregat, NE Spain). *Environmental Science and Pollution Research* **2012**, 19, 1000–1012, <https://doi.org/10.1007/s11356-011-0596-z>.
7. Reis, E.O.; Santos, L.V.S.; Lange, L.C. Prioritization and Environmental Risk Assessment of Pharmaceuticals Mixtures from Brazilian Surface Waters. *Environmental Pollution* **2021**, 288, <https://doi.org/10.1016/j.envpol.2021.117803>.
8. Dai, G.; Wang, B.; Fu, C.; Dong, R.; Huang, J.; Deng, S.; Wang, Y.; Yu, G. Pharmaceuticals and Personal Care Products (PPCPs) in Urban and Suburban Rivers of Beijing, China: Occurrence, Source Apportionment and Potential Ecological Risk. *Environmental Science: Processes and Impacts* **2016**, 18, 445–455, <https://doi.org/10.1039/c6em00018e>.
9. Jin, S.O.; Park, J.; Jung Lee, M.; Young Park, S.; Lee, J.; Choi, K. Hazard/Risk Assessment. Ecological hazard assessment of major veterinary benzimidazoles: acute and chronic toxicities to aquatic microbes and invertebrates. *Environmental Toxicology and Chemistry* **2006**, 25 (8), 2221-6.
10. Wagil, M.; Białk-Bielińska, A.; Puckowski, A.; Wychodnik, K.; Maszkowska, J.; Mulkiewicz, E.; Kumirska, J.; Stepnowski, P.; Stolte, S. Toxicity of Anthelmintic Drugs (Fenbendazole and Flubendazole) to Aquatic Organisms. *Environmental Science and Pollution Research* **2015**, 22, 2566–2573, <https://doi.org/10.1007/s11356-014-3497-0>.
11. Cui, J.; Fu, L.; Tang, B.; Bin, L.; Li, P.; Huang, S.; Fu, F. Occurrence, Ecotoxicological Risks of Sulfonamides and Their Acetylated Metabolites in the Typical Wastewater Treatment Plants and Receiving Rivers at the Pearl River Delta. *Science of the Total Environment* **2020**, 709, <https://doi.org/10.1016/j.scitotenv.2019.136192>.
12. Park, J.; An, S.; Jho, E.H.; Bae, S.; Choi, Y.; Choe, J.K. Exploring Reductive Degradation of Fluorinated Pharmaceuticals Using Al<sub>2</sub>O<sub>3</sub>-Supported Pt-Group Metallic Catalysts: Catalytic Reactivity, Reaction Pathways, and Toxicity Assessment. *Water Research* **2020**, 185, <https://doi.org/10.1016/j.watres.2020.116242>.
13. Visca Palermo, M. Emerging Pollutants Removal in Wastewater Treatment Plants: A review and their implications in a river basin in Uruguay. This research is done for the partial fulfilment of requirements for the Master of Science degree at the UNESCO-IHE Institute for Water Education, Delft, the Netherlands. 2017. [https://saniup.org/wp-content/uploads/2018/01/UWS-SE-CALI-2017-17-Mercedes-Visca-Palermo\\_EXAM-VERSION.pdf](https://saniup.org/wp-content/uploads/2018/01/UWS-SE-CALI-2017-17-Mercedes-Visca-Palermo_EXAM-VERSION.pdf)
